# Supplementary material for: Eukaryotic Translation Elongation Factor 1-Alpha 1 Inhibits p53 and p73 Dependent Apoptosis and Chemotherapy Sensitivity
Source: PLOS journal article supplement (doi:10.1371/journal.pone.0066436), 2013-06-14
Supplement: S2 (10.1371/journal.pone.0066436.s002) [file journal.pone.0066436.s002]

**Supplemental Figure S2. Blanch *et al.***

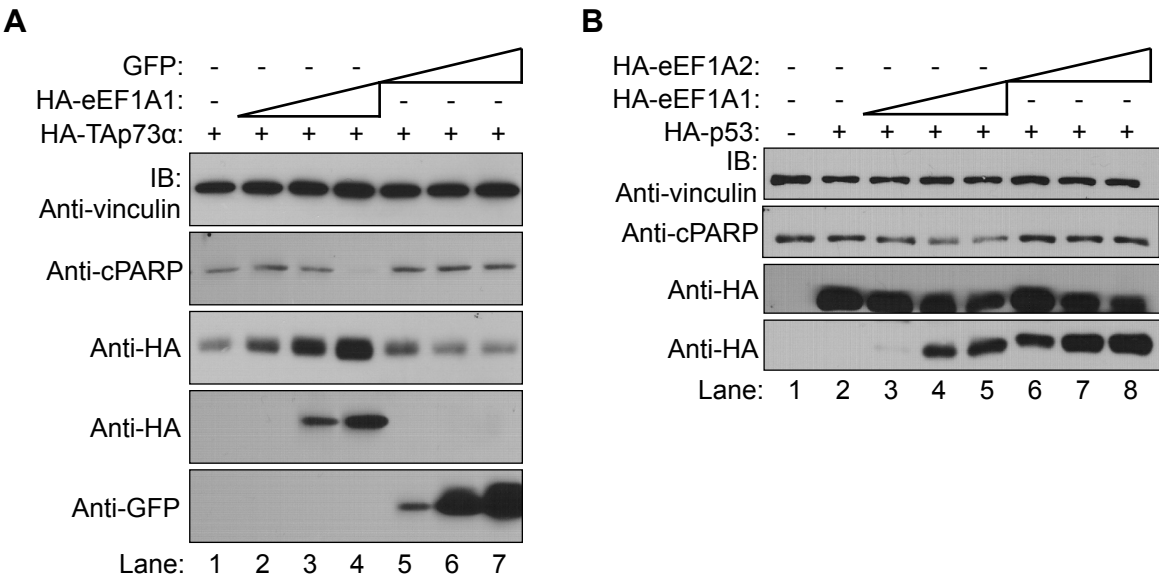

**Figure S2. Ectopic expression of eEF1A1 inhibits p53 and p73 induced apoptosis. Figure S2A,** HeLa cells were transfected with constant amounts of plasmid encoding HA-TAp73α and increasing amounts of plasmid encoding either HA-eEF1A1 or GFP (p73 to eEF1A1/GFP ratios were 1:1, 1:5 and 1:10). Cells were lysed and whole cell extracts were resolved by SDS-PAGE and immunoblotted with the indicated antibodies. **Figure S2B,** HeLa cells were transfected with constant amounts of plasmid encoding HA-p53 and increasing amounts of plasmid encoding either HA tagged eEF1A1 or eEF1A2 (p53 to eEF1A1/2 ratios were 1:1, 1:5 and 1:10). Cells were lysed and whole cell extracts were resolved by SDS-PAGE and immunoblotted with the indicated antibodies.
